# Supplementary material
Source: publisher site journal article supplement (https://www.dovepress.com/article/536281)
Supplement: Supplementary file 1 [file 536281%20Revised%20Supplemental%20Material.pdf]

# Supplemental Material 1: Supplemental methods

## Molecular Docking Methods

### Receptor and Ligand Preparation

In this study, AGR2 was selected as the receptor, and its structure file was preprocessed and saved in PDBQT format (AGR2.pdbqt). Four candidate compounds—Ciclosporin, Dexamethasone, Dobutamine, and Fenoterol—were prepared as ligands. All ligands were protonated, energy-minimized, and converted into PDBQT format under standard preparation procedures. During receptor preparation, crystallographic water molecules were removed and polar hydrogens were added.

### Docking Parameter Settings

Molecular docking was performed using AutoDock Vina. The grid box parameters were configured as follows:

#### Grid center coordinates:

- center\_x = 0.106
- center\_y = 2.241
- center\_z = 17.429

#### Grid dimensions (Å):

- size\_x = 38
- size\_y = 56
- size\_z = 70

The docking search parameters were:

- energy\_range = 5
- num\_modes = 10 (generating up to 10 candidate poses for each docking run)

This grid box fully encompassed the major predicted binding pocket of AGR2, and all ligands were docked using identical parameters.

### Pose Selection and Interaction Analysis

For each ligand, the pose with the lowest binding energy (highest Vina score) was selected for subsequent analysis. Hydrogen-bond interactions between the ligand and AGR2 were identified using molecular visualization tools, and key hydrogen-bond distances and residue names were recorded.

### Summary of Key Hydrogen-Bond Interactions

#### Ciclosporin

- SER-45: 2.6 Å

#### Dexamethasone

- TRP-54: 2.0 Å
- TRP-54: 3.1 Å
- GLU-60: 2.7 Å
- LYS-64: 2.1 Å
- THR-55: 2.8 Å

#### Dobutamine

- PHE-104: 2.5 Å
- GLU-102: 2.5 Å

#### Fenoterol

- PRO-71: 2.2 Å
- GLN-103: 2.3 Å

These interactions provide structural evidence for the potential binding modes of the four drugs with AGR2.

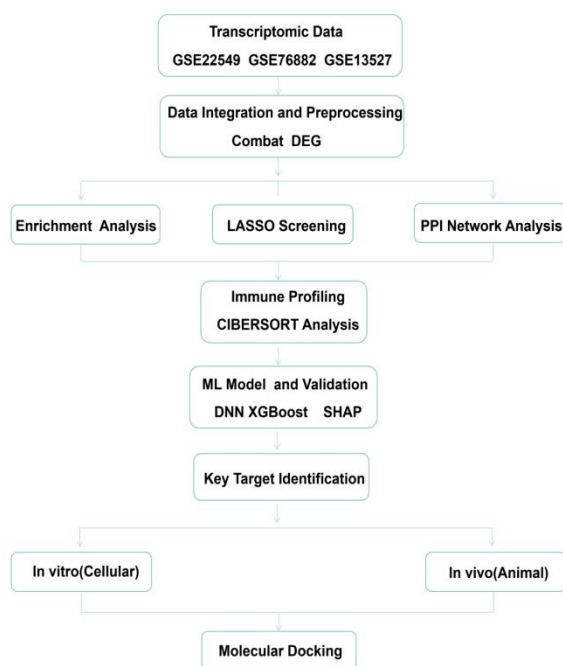

**Supplemental Figure 1.** Workflow of the integrated analytical pipeline for biomarker identification.

## Supplemental Table 1. Sequence of siRNA

| Gene name | Sequence                         |
|-----------|----------------------------------|
| si-NC     | Sense: UUCUCCGAACGUGUCACGUTT     |
|           | Antisense: ACGUGACACGUUCGGAGAATT |
| si-AGR2   | Sense: CCAAAAAGGACCCAAAGGATT     |
|           | Antisense: UCCUUUGGGUCCUUUUUGGTT |
| si-DOCK2  | Sense: AUGUACGACCUGAUGGAAUTT     |
|           | Antisense: AUUCCAUCAGGUCGUACAUTT |

Supplemental Table 2: Results of Drug Enrichment Analysis

| ID                                                | Description                                                                                                                                                     | GeneRatio | BgRatio   | pvalue               | p.adjust            | qvalue              | geneID                           | Count |
|---------------------------------------------------|-----------------------------------------------------------------------------------------------------------------------------------------------------------------|-----------|-----------|----------------------|---------------------|---------------------|----------------------------------|-------|
| dexamethasone CTD 00005779                        | <a href="http://dsigdb.tanlab.org/DSigDBv1.0/displayDrug.py?db=d4ctd&amp;id=5779">http://dsigdb.tanlab.org/DSigDBv1.0/displayDrug.py?db=d4ctd&amp;id=5779</a>   | 6/25      | 421/19646 | 1.17141928101793e-05 | 0.00664310173816583 | 0.00350976538697206 | CYBB/HLA-DPB1/FPRI/AGR2/EGF/SOST | 6     |
| isotretinoin HL60 UP                              | <a href="http://dsigdb.tanlab.org/DSigDBv1.0/displayDrug.py?db=d3&amp;id=1002">http://dsigdb.tanlab.org/DSigDBv1.0/displayDrug.py?db=d3&amp;id=1002</a>         | 4/25      | 136/19646 | 2.48246021532053e-05 | 0.00664310173816583 | 0.00350976538697206 | PLEK/CYBB/CCR2/CD300A            | 4     |
| diphenylpyraline BOSS                             | <a href="http://dsigdb.tanlab.org/DSigDBv1.0/displayDrug.py?db=d4boss&amp;id=1068">http://dsigdb.tanlab.org/DSigDBv1.0/displayDrug.py?db=d4boss&amp;id=1068</a> | 4/25      | 168/19646 | 5.67242584303721e-05 | 0.00664310173816583 | 0.00350976538697206 | HLA-DPB1/CFB/CCR2/PVALB          | 4     |
| XENON BOSS                                        | <a href="http://dsigdb.tanlab.org/DSigDBv1.0/displayDrug.py?db=d4boss&amp;id=1947">http://dsigdb.tanlab.org/DSigDBv1.0/displayDrug.py?db=d4boss&amp;id=1947</a> | 2/25      | 10/19646  | 6.95224634519874e-05 | 0.00664310173816583 | 0.00350976538697206 | CFB/PVALB                        | 2     |
| 4-aminobutyric acid BOSS                          | <a href="http://dsigdb.tanlab.org/DSigDBv1.0/displayDrug.py?db=d4boss&amp;id=753">http://dsigdb.tanlab.org/DSigDBv1.0/displayDrug.py?db=d4boss&amp;id=753</a>   | 4/25      | 180/19646 | 7.4166203803745e-05  | 0.00664310173816583 | 0.00350976538697206 | CFB/SLC1A3/EGF/PVALB             | 4     |
| Ethylparaben BOSS                                 | <a href="http://dsigdb.tanlab.org/DSigDBv1.0/displayDrug.py?db=d4boss&amp;id=509">http://dsigdb.tanlab.org/DSigDBv1.0/displayDrug.py?db=d4boss&amp;id=509</a>   | 4/25      | 186/19646 | 8.42187585621697e-05 | 0.00664310173816583 | 0.00350976538697206 | CYBB/CFB/EGF/PVALB               | 4     |
| Erythorbic acid BOSS                              | <a href="http://dsigdb.tanlab.org/DSigDBv1.0/displayDrug.py?db=d4boss&amp;id=636">http://dsigdb.tanlab.org/DSigDBv1.0/displayDrug.py?db=d4boss&amp;id=636</a>   | 4/25      | 187/19646 | 8.59859208668699e-05 | 0.00664310173816583 | 0.00350976538697206 | CYBB/CFB/EGF/PVALB               | 4     |
| hydrogen peroxide BOSS                            | <a href="http://dsigdb.tanlab.org/DSigDBv1.0/displayDrug.py?db=d4boss&amp;id=1796">http://dsigdb.tanlab.org/DSigDBv1.0/displayDrug.py?db=d4boss&amp;id=1796</a> | 4/25      | 189/19646 | 8.96011188070381e-05 | 0.00664310173816583 | 0.00350976538697206 | CYBB/CFB/EGF/PVALB               | 4     |
| D-Norepinephrine d-bitartrate BOSS                | <a href="http://dsigdb.tanlab.org/DSigDBv1.0/displayDrug.py?db=d4boss&amp;id=643">http://dsigdb.tanlab.org/DSigDBv1.0/displayDrug.py?db=d4boss&amp;id=643</a>   | 4/25      | 190/19646 | 9.14496564984576e-05 | 0.00664310173816583 | 0.00350976538697206 | CYBB/CFB/EGF/PVALB               | 4     |
| L-glutamine BOSS                                  | <a href="http://dsigdb.tanlab.org/DSigDBv1.0/displayDrug.py?db=d4boss&amp;id=922">http://dsigdb.tanlab.org/DSigDBv1.0/displayDrug.py?db=d4boss&amp;id=922</a>   | 4/25      | 190/19646 | 9.14496564984576e-05 | 0.00664310173816583 | 0.00350976538697206 | CFB/SLC1A3/EGF/PVALB             | 4     |
| nitric oxide BOSS                                 | <a href="http://dsigdb.tanlab.org/DSigDBv1.0/displayDrug.py?db=d4boss&amp;id=1147">http://dsigdb.tanlab.org/DSigDBv1.0/displayDrug.py?db=d4boss&amp;id=1147</a> | 4/25      | 191/19646 | 9.33258226306821e-05 | 0.00664310173816583 | 0.00350976538697206 | CYBB/CFB/EGF/PVALB               | 4     |
| Acetylcholine bromide BOSS                        | <a href="http://dsigdb.tanlab.org/DSigDBv1.0/displayDrug.py?db=d4boss&amp;id=197">http://dsigdb.tanlab.org/DSigDBv1.0/displayDrug.py?db=d4boss&amp;id=197</a>   | 4/25      | 198/19646 | 0.000107253918545167 | 0.00699831818507216 | 0.00369743771826761 | CYBB/CFB/EGF/PVALB               | 4     |
| Chloroethylene BOSS                               | <a href="http://dsigdb.tanlab.org/DSigDBv1.0/displayDrug.py?db=d4boss&amp;id=1631">http://dsigdb.tanlab.org/DSigDBv1.0/displayDrug.py?db=d4boss&amp;id=1631</a> | 2/25      | 15/19646  | 0.000161587336091415 | 0.00973252955073678 | 0.00514200996630981 | CFB/PVALB                        | 2     |
| thioridazine HL60 DOWN                            | <a href="http://dsigdb.tanlab.org/DSigDBv1.0/displayDrug.py?db=d3&amp;id=1844">http://dsigdb.tanlab.org/DSigDBv1.0/displayDrug.py?db=d3&amp;id=1844</a>         | 2/25      | 18/19646  | 0.000234905360102463 | 0.0131379212114449  | 0.00694118846017051 | CCR2/FPRI                        | 2     |
| RUTHENIUM BOSS                                    | <a href="http://dsigdb.tanlab.org/DSigDBv1.0/displayDrug.py?db=d4boss&amp;id=1690">http://dsigdb.tanlab.org/DSigDBv1.0/displayDrug.py?db=d4boss&amp;id=1690</a> | 2/25      | 21/19646  | 0.000321665473169416 | 0.0162843801675809  | 0.00860356443618914 | CFB/PVALB                        | 2     |
| SODIUM BICARBONATE BOSS                           | <a href="http://dsigdb.tanlab.org/DSigDBv1.0/displayDrug.py?db=d4boss&amp;id=1739">http://dsigdb.tanlab.org/DSigDBv1.0/displayDrug.py?db=d4boss&amp;id=1739</a> | 3/25      | 108/19646 | 0.00034024862143482  | 0.0162843801675809  | 0.00860356443618914 | CFB/EGF/PVALB                    | 3     |
| lasalocid HL60 DOWN                               | <a href="http://dsigdb.tanlab.org/DSigDBv1.0/displayDrug.py?db=d3&amp;id=1038">http://dsigdb.tanlab.org/DSigDBv1.0/displayDrug.py?db=d3&amp;id=1038</a>         | 2/25      | 22/19646  | 0.000353556146678002 | 0.0162843801675809  | 0.00860356443618914 | CCR2/FPRI                        | 2     |
| rimexolone HL60 UP                                | <a href="http://dsigdb.tanlab.org/DSigDBv1.0/displayDrug.py?db=d3&amp;id=1650">http://dsigdb.tanlab.org/DSigDBv1.0/displayDrug.py?db=d3&amp;id=1650</a>         | 2/25      | 23/19646  | 0.000386926266870281 | 0.0168312926088572  | 0.00889251595789593 | CCR2/FPRI                        | 2     |
| ETHYLENE GLYCOL BOSS                              | <a href="http://dsigdb.tanlab.org/DSigDBv1.0/displayDrug.py?db=d4boss&amp;id=311">http://dsigdb.tanlab.org/DSigDBv1.0/displayDrug.py?db=d4boss&amp;id=311</a>   | 3/25      | 116/19646 | 0.000419593902171694 | 0.0172702074035906  | 0.00912440883190307 | CFB/EGF/PVALB                    | 3     |
| Ethylene dimethylacrylate BOSS                    | <a href="http://dsigdb.tanlab.org/DSigDBv1.0/displayDrug.py?db=d4boss&amp;id=1974">http://dsigdb.tanlab.org/DSigDBv1.0/displayDrug.py?db=d4boss&amp;id=1974</a> | 3/25      | 118/19646 | 0.000441129180168342 | 0.0172702074035906  | 0.00912440883190307 | CFB/EGF/PVALB                    | 3     |
| dobutamine PC3 UP                                 | <a href="http://dsigdb.tanlab.org/DSigDBv1.0/displayDrug.py?db=d3&amp;id=655">http://dsigdb.tanlab.org/DSigDBv1.0/displayDrug.py?db=d3&amp;id=655</a>           | 2/25      | 27/19646  | 0.000535131027149262 | 0.0199527425837082  | 0.0105416788806847  | AGR2/ISG20                       | 2     |
| acetaldehyde CTD 00005293                         | <a href="http://dsigdb.tanlab.org/DSigDBv1.0/displayDrug.py?db=d4ctd&amp;id=5293">http://dsigdb.tanlab.org/DSigDBv1.0/displayDrug.py?db=d4ctd&amp;id=5293</a>   | 3/25      | 129/19646 | 0.000572317089417325 | 0.0203692855006257  | 0.0107617519684693  | CYBB/CCR2/EGF                    | 3     |
| pergolide HL60 UP                                 | <a href="http://dsigdb.tanlab.org/DSigDBv1.0/displayDrug.py?db=d3&amp;id=1398">http://dsigdb.tanlab.org/DSigDBv1.0/displayDrug.py?db=d3&amp;id=1398</a>         | 4/25      | 312/19646 | 0.000606464288282201 | 0.0204091042254249  | 0.0107827894879236  | CYBB/FPRI/ISG20/FCER1G           | 4     |
| ACRYLAMIDE BOSS                                   | <a href="http://dsigdb.tanlab.org/DSigDBv1.0/displayDrug.py?db=d4boss&amp;id=1575">http://dsigdb.tanlab.org/DSigDBv1.0/displayDrug.py?db=d4boss&amp;id=1575</a> | 3/25      | 133/19646 | 0.000625566413039842 | 0.0204091042254249  | 0.0107827894879236  | CFB/EGF/PVALB                    | 3     |
| Deuterium hydride BOSS                            | <a href="http://dsigdb.tanlab.org/DSigDBv1.0/displayDrug.py?db=d4boss&amp;id=690">http://dsigdb.tanlab.org/DSigDBv1.0/displayDrug.py?db=d4boss&amp;id=690</a>   | 2/25      | 35/19646  | 0.000901491445880294 | 0.0250215234032455  | 0.0132196796363185  | CFB/PVALB                        | 2     |
| nitrate BOSS                                      | <a href="http://dsigdb.tanlab.org/DSigDBv1.0/displayDrug.py?db=d4boss&amp;id=1903">http://dsigdb.tanlab.org/DSigDBv1.0/displayDrug.py?db=d4boss&amp;id=1903</a> | 3/25      | 152/19646 | 0.00092165879889143  | 0.0250215234032455  | 0.0132196796363185  | CYBB/CFB/PVALB                   | 3     |
| ammonia BOSS                                      | <a href="http://dsigdb.tanlab.org/DSigDBv1.0/displayDrug.py?db=d4boss&amp;id=315">http://dsigdb.tanlab.org/DSigDBv1.0/displayDrug.py?db=d4boss&amp;id=315</a>   | 3/25      | 163/19646 | 0.00112767175503496  | 0.0250215234032455  | 0.0132196796363185  | CFB/EGF/PVALB                    | 3     |
| Silica BOSS                                       | <a href="http://dsigdb.tanlab.org/DSigDBv1.0/displayDrug.py?db=d4boss&amp;id=2078">http://dsigdb.tanlab.org/DSigDBv1.0/displayDrug.py?db=d4boss&amp;id=2078</a> | 2/25      | 40/19646  | 0.00117719167195893  | 0.0250215234032455  | 0.0132196796363185  | CFB/PVALB                        | 2     |
| acetaminophen BOSS                                | <a href="http://dsigdb.tanlab.org/DSigDBv1.0/displayDrug.py?db=d4boss&amp;id=842">http://dsigdb.tanlab.org/DSigDBv1.0/displayDrug.py?db=d4boss&amp;id=842</a>   | 3/25      | 167/19646 | 0.001209224252888683 | 0.0250215234032455  | 0.0132196796363185  | CFB/CCR2/PVALB                   | 3     |
| asparagine BOSS                                   | <a href="http://dsigdb.tanlab.org/DSigDBv1.0/displayDrug.py?db=d4boss&amp;id=320">http://dsigdb.tanlab.org/DSigDBv1.0/displayDrug.py?db=d4boss&amp;id=320</a>   | 2/25      | 41/19646  | 0.00123659668841769  | 0.0250215234032455  | 0.0132196796363185  | CFB/EGF                          | 2     |
| Aziridine BOSS                                    | <a href="http://dsigdb.tanlab.org/DSigDBv1.0/displayDrug.py?db=d4boss&amp;id=847">http://dsigdb.tanlab.org/DSigDBv1.0/displayDrug.py?db=d4boss&amp;id=847</a>   | 2/25      | 42/19646  | 0.0012974153957935   | 0.0250215234032455  | 0.0132196796363185  | CFB/EGF                          | 2     |
| L-aspartic acid BOSS                              | <a href="http://dsigdb.tanlab.org/DSigDBv1.0/displayDrug.py?db=d4boss&amp;id=1214">http://dsigdb.tanlab.org/DSigDBv1.0/displayDrug.py?db=d4boss&amp;id=1214</a> | 3/25      | 173/19646 | 0.00133839841816488  | 0.0250215234032455  | 0.0132196796363185  | CFB/SLC1A3/EGF                   | 3     |
| dimethyl sulfoxide BOSS                           | <a href="http://dsigdb.tanlab.org/DSigDBv1.0/displayDrug.py?db=d4boss&amp;id=802">http://dsigdb.tanlab.org/DSigDBv1.0/displayDrug.py?db=d4boss&amp;id=802</a>   | 3/25      | 177/19646 | 0.00142916754307335  | 0.0250215234032455  | 0.0132196796363185  | CFB/EGF/PVALB                    | 3     |
| palmitic acid BOSS                                | <a href="http://dsigdb.tanlab.org/DSigDBv1.0/displayDrug.py?db=d4boss&amp;id=1059">http://dsigdb.tanlab.org/DSigDBv1.0/displayDrug.py?db=d4boss&amp;id=1059</a> | 3/25      | 177/19646 | 0.00142916754307335  | 0.0250215234032455  | 0.0132196796363185  | CYBB/CFB/EGF                     | 3     |
| 2,2',3,4,4',5,5'-HEPTACHLOROBIPHENYL_CTD_00003812 | <a href="http://dsigdb.tanlab.org/DSigDBv1.0/displayDrug.py?db=d4ctd&amp;id=3812">http://dsigdb.tanlab.org/DSigDBv1.0/displayDrug.py?db=d4ctd&amp;id=3812</a>   | 2/25      | 45/19646  | 0.00148831966740316  | 0.0250215234032455  | 0.0132196796363185  | CCR2/SERPINA3                    | 2     |
| fenoterol PC3 UP                                  | <a href="http://dsigdb.tanlab.org/DSigDBv1.0/displayDrug.py?db=d3&amp;id=774">http://dsigdb.tanlab.org/DSigDBv1.0/displayDrug.py?db=d3&amp;id=774</a>           | 2/25      | 45/19646  | 0.00148831966740316  | 0.0250215234032455  | 0.0132196796363185  | AGR2/ISG20                       | 2     |
| (-)-isoprenaline HL60 UP                          | <a href="http://dsigdb.tanlab.org/DSigDBv1.0/displayDrug.py?db=d3&amp;id=7">http://dsigdb.tanlab.org/DSigDBv1.0/displayDrug.py?db=d3&amp;id=7</a>               | 3/25      | 182/19646 | 0.00154796911722029  | 0.0250215234032455  | 0.0132196796363185  | HLA-DPB1/FPRI/ISG20              | 3     |
| L-leucine BOSS                                    | <a href="http://dsigdb.tanlab.org/DSigDBv1.0/displayDrug.py?db=d4boss&amp;id=914">http://dsigdb.tanlab.org/DSigDBv1.0/displayDrug.py?db=d4boss&amp;id=914</a>   | 3/25      | 182/19646 | 0.00154796911722029  | 0.0250215234032455  | 0.0132196796363185  | CFB/EGF/PVALB                    | 3     |
| glycerol BOSS                                     | <a href="http://dsigdb.tanlab.org/DSigDBv1.0/displayDrug.py?db=d4boss&amp;id=877">http://dsigdb.tanlab.org/DSigDBv1.0/displayDrug.py?db=d4boss&amp;id=877</a>   | 3/25      | 183/19646 | 0.00157245066880769  | 0.0250215234032455  | 0.0132196796363185  | CFB/EGF/PVALB                    | 3     |
| L-alanine BOSS                                    | <a href="http://dsigdb.tanlab.org/DSigDBv1.0/displayDrug.py?db=d4boss&amp;id=1210">http://dsigdb.tanlab.org/DSigDBv1.0/displayDrug.py?db=d4boss&amp;id=1210</a> | 3/25      | 186/19646 | 0.00164735414262895  | 0.0250215234032455  | 0.0132196796363185  | CFB/EGF/PVALB                    | 3     |
| L-cysteine BOSS                                   | <a href="http://dsigdb.tanlab.org/DSigDBv1.0/displayDrug.py?db=d4boss&amp;id=912">http://dsigdb.tanlab.org/DSigDBv1.0/displayDrug.py?db=d4boss&amp;id=912</a>   | 3/25      | 186/19646 | 0.00164735414262895  | 0.0250215234032455  | 0.0132196796363185  | CFB/EGF/PVALB                    | 3     |
| lactic acid BOSS                                  | <a href="http://dsigdb.tanlab.org/DSigDBv1.0/displayDrug.py?db=d4boss&amp;id=883">http://dsigdb.tanlab.org/DSigDBv1.0/displayDrug.py?db=d4boss&amp;id=883</a>   | 3/25      | 186/19646 | 0.00164735414262895  | 0.0250215234032455  | 0.0132196796363185  | CFB/EGF/PVALB                    | 3     |
| methane BOSS                                      | <a href="http://dsigdb.tanlab.org/DSigDBv1.0/displayDrug.py?db=d4boss&amp;id=1202">http://dsigdb.tanlab.org/DSigDBv1.0/displayDrug.py?db=d4boss&amp;id=1202</a> | 3/25      | 186/19646 | 0.00164735414262895  | 0.0250215234032455  | 0.0132196796363185  | CFB/EGF/PVALB                    | 3     |
| methanol BOSS                                     | <a href="http://dsigdb.tanlab.org/DSigDBv1.0/displayDrug.py?db=d4boss&amp;id=1566">http://dsigdb.tanlab.org/DSigDBv1.0/displayDrug.py?db=d4boss&amp;id=1566</a> | 3/25      | 186/19646 | 0.00164735414262895  | 0.0250215234032455  | 0.0132196796363185  | CFB/EGF/PVALB                    | 3     |
| acetic acid BOSS                                  | <a href="http://dsigdb.tanlab.org/DSigDBv1.0/displayDrug.py?db=d4boss&amp;id=1008">http://dsigdb.tanlab.org/DSigDBv1.0/displayDrug.py?db=d4boss&amp;id=1008</a> | 3/25      | 187/19646 | 0.00167281123320115  | 0.0250215234032455  | 0.0132196796363185  | CFB/EGF/PVALB                    | 3     |
| liothyronine BOSS                                 | <a href="http://dsigdb.tanlab.org/DSigDBv1.0/displayDrug.py?db=d4boss&amp;id=846">http://dsigdb.tanlab.org/DSigDBv1.0/displayDrug.py?db=d4boss&amp;id=846</a>   | 3/25      | 187/19646 | 0.00167281123320115  | 0.0250215234032455  | 0.0132196796363185  | CFB/EGF/PVALB                    | 3     |
| sodium chloride BOSS                              | <a href="http://dsigdb.tanlab.org/DSigDBv1.0/displayDrug.py?db=d4boss&amp;id=1114">http://dsigdb.tanlab.org/DSigDBv1.0/displayDrug.py?db=d4boss&amp;id=1114</a> | 3/25      | 187/19646 | 0.00167281123320115  | 0.0250215234032455  | 0.0132196796363185  | CFB/EGF/PVALB                    | 3     |
| gossypol HL60 DOWN                                | <a href="http://dsigdb.tanlab.org/DSigDBv1.0/displayDrug.py?db=d3&amp;id=876">http://dsigdb.tanlab.org/DSigDBv1.0/displayDrug.py?db=d3&amp;id=876</a>           | 2/25      | 48/19646  | 0.00169182501375537  | 0.0250215234032455  | 0.0132196796363185  | MS4A6A/CCR2                      | 2     |
| Coke BOSS                                         | <a href="http://dsigdb.tanlab.org/DSigDBv1.0/displayDrug.py?db=d4boss&amp;id=63">http://dsigdb.tanlab.org/DSigDBv1.0/displayDrug.py?db=d4boss&amp;id=63</a>     | 3/25      | 189/19646 | 0.00172446465798665  | 0.0250215234032455  | 0.0132196796363185  | CFB/EGF/PVALB                    | 3     |
| Superoxide BOSS                                   | <a href="http://dsigdb.tanlab.org/DSigDBv1.0/displayDrug.py?db=d4boss&amp;id=1795">http://dsigdb.tanlab.org/DSigDBv1.0/displayDrug.py?db=d4boss&amp;id=1795</a> | 3/25      | 189/19646 | 0.00172446465798665  | 0.0250215234032455  | 0.0132196796363185  | CYBB/CFB/FPRI                    | 3     |
| glutathione BOSS                                  | <a href="http://dsigdb.tanlab.org/DSigDBv1.0/displayDrug.py?db=d4boss&amp;id=600">http://dsigdb.tanlab.org/DSigDBv1.0/displayDrug.py?db=d4boss&amp;id=600</a>   | 3/25      | 190/19646 | 0.0017506627596148   | 0.0250215234032455  | 0.0132196796363185  | CYBB/CFB/EGF                     | 3     |
| HEXACHLOROETHANE BOSS                             | <a href="http://dsigdb.tanlab.org/DSigDBv1.0/displayDrug.py?db=d4boss&amp;id=1639">http://dsigdb.tanlab.org/DSigDBv1.0/displayDrug.py?db=d4boss&amp;id=1639</a> | 3/25      | 190/19646 | 0.0017506627596148   | 0.0250215234032455  | 0.0132196796363185  | CFB/FGB/EGF                      | 3     |
| L-glutamic acid BOSS                              | <a href="http://dsigdb.tanlab.org/DSigDBv1.0/displayDrug.py?db=d4boss&amp;id=1211">http://dsigdb.tanlab.org/DSigDBv1.0/displayDrug.py?db=d4boss&amp;id=1211</a> | 3/25      | 190/19646 | 0.0017506627596148   | 0.0250215234032455  | 0.0132196796363185  | CFB/SLC1A3/PVALB                 | 3     |
| propionic acid BOSS                               | <a href="http://dsigdb.tanlab.org/DSigDBv1.0/displayDrug.py?db=d4boss&amp;id=1304">http://dsigdb.tanlab.org/DSigDBv1.0/displayDrug.py?db=d4boss&amp;id=1304</a> | 2/25      | 49/19646  | 0.00176244461071678  | 0.0250215234032455  | 0.0132196796363185  | CFB/PVALB                        | 2     |
| Angiotensin II, human BOSS                        | <a href="http://dsigdb.tanlab.org/DSigDBv1.0/displayDrug.py?db=d4boss&amp;id=136">http://dsigdb.tanlab.org/DSigDBv1.0/displayDrug.py?db=d4boss&amp;id=136</a>   | 3/25      | 193/19646 | 0.00183075314143029  | 0.0250215234032455  | 0.0132196796363185  | CYBB/CCR2/EGF                    | 3     |
| diazepam BOSS                                     | <a href="http://dsigdb.tanlab.org/DSigDBv1.0/displayDrug.py?db=d4boss&amp;id=1405">http://dsigdb.tanlab.org/DSigDBv1.0/displayDrug.py?db=d4boss&amp;id=1405</a> | 3/25      | 193/19646 | 0.00183075314143029  | 0.0250215234032455  | 0.0132196796363185  | CFB/EGF/PVALB                    | 3     |
| (+)-chelidonium HL60 DOWN                         | <a href="http://dsigdb.tanlab.org/DSigDBv1.0/displayDrug.py?db=d3&amp;id=2">http://dsigdb.tanlab.org/DSigDBv</a>                                                |           |           |                      |                     |                     |                                  |       |
